# Supplementary material for: Beginning power mobility: An exploration of factors associated with child use of early power mobility devices and parent device preference
Source: PubMed Central journal article supplement — J Rehabil Assist Technol Eng. 2020 Jun 17;7:2055668320926046. doi: 10.1177/2055668320926046 (PMC7301654; doi:10.1177/2055668320926046), 2020-06-17
Supplement: sj-pdf-1-jrt-10.1177_2055668320926046.pdf [file sj-pdf-1-jrt-10.1177_2055668320926046.pdf]

**Appendix 1: Participants with diagnoses other than cerebral palsy**

| <b>Diagnostic group</b>                     | <b>GMFCS age band</b> | <b>Gross motor abilities</b>                                     | <b>Manual abilities</b>                               | <b>CFCS</b> | <b>LSS</b> |
|---------------------------------------------|-----------------------|------------------------------------------------------------------|-------------------------------------------------------|-------------|------------|
| <b>Other stable neurological conditions</b> |                       |                                                                  |                                                       |             |            |
| Prematurity                                 | Under 2               | II - Sits independently, pulls to stand; steps with hand support | I - Handles objects easily                            | 4           | 3          |
| Spina Bifida                                | Under 2               | III - Sits with low back support; scoots on floor                | III - Handles a limited selection of objects          | 4           | 5          |
| Down Syndrome                               | Under 2               | III - Sits independently on floor; commando crawls               | III - Handles a limited selection of objects          | 4           | 5          |
| Down Syndrome                               | Under 2               | IV - Sits with low back support; rolls on floor                  | II - handles objects, reduced speed and accuracy      | 4           | 4          |
| Spina Bifida                                | Under 2               | IV - Sits with trunk support; rolls on floor                     | II - Handles most objects, reduced speed and accuracy | 5           | 3          |
| Prematurity – ventilator dependent          | 2-4 years             | IV - Sits independently; rolls on floor                          | III - Lifts and places simple toys                    | 5           | 5          |
| Prematurity                                 | Under 2               | I - Sits independently; pulls to stand; cruises                  | I - Handles most objects easily                       | 4           | 4          |
| Spina Bifida                                | 4-6 years             | III - Walks with braces and hand-held walker                     | I - Handles objects easily                            | 1           | 8          |
| Undiagnosed                                 | 2-4 years             | V - Lacks ability to change position                             | V - presses a single switch                           | 5           | 3          |
| Spina Bifida                                | Under 2               | IV - Sits with trunk support, rolls on floor                     | IV - grasps and releases a few simple toys            | 4           | 4          |
| Hydrocephalus                               | 2-4 years             | IV - Sits independently; commando crawls                         | III - handles simple toys independently               | 4           | 5          |
| Metabolic Disorder                          | 4-6 years             | V - Lacks ability to change position                             | V - touches switch with adult assistance              | V           | 2          |
| <b>Neuromuscular Conditions</b>             |                       |                                                                  |                                                       |             |            |
| Spinal Muscular Atrophy type 2              | 2-4 years             | III - Sits independently, scoots on floor                        | I - Handles objects easily                            | I           | 5          |
| Central Core Myopathy                       | Under 2               | V - Lacks ability to change position                             | IV - Able to grasp simple, lightweight toys           | IV          | 2          |
| Spinal Muscular Atrophy type 1              | Under 2               | V - Lacks ability to change position                             | V - too weak to lift or handle objects.               | IV          | 2          |
| Spinal Muscular Atrophy type 2              | Under 2               | IV - Sits with trunk support; rolls on floor                     | II - handles most objects                             | III         | 5          |
| <b>Neuro-degenerative disorders</b>         |                       |                                                                  |                                                       |             |            |
| Leukodystrophy                              | 4-6 yrs               | V - Lacks ability to change position                             | IV - Able to grasp a few easily managed objects       | V           | 3          |
| Pontocerebellar Hypoplasia                  | Under 2               | V - Lacks ability to change position                             | V - touches switch with adult assistance              | V           | 2          |
| Metabolic Disorder                          | 2-4 years             | V - Lacks ability to change position                             | IV - able to grasp a few simple objects               | V           | 2          |
| Metabolic Disorder                          | Under 2               | III - Sits independently on floor                                | III - handles simple toys independently               | IV          | 5          |

CFCS =Communication Function Classification System; GMFCS =Gross Motor Function Classification System; LSS =Level of Sitting Scale
