# Supplementary material for: Beginning power mobility: An exploration of factors associated with child use of early power mobility devices and parent device preference
Source: PubMed Central journal article supplement — J Rehabil Assist Technol Eng. 2020 Jun 17;7:2055668320926046. doi: 10.1177/2055668320926046 (PMC7301654; doi:10.1177/2055668320926046), 2020-06-17
Supplement: sj-pdf-2-jrt-10.1177_2055668320926046.pdf [file sj-pdf-2-jrt-10.1177_2055668320926046.pdf]

**Appendix 2:** Correlations between classifications for full sample, cerebral palsy only and other diagnoses

| Correlation                                                          | Full sample n = 75     | CP only n = 55         | Other diagnoses n = 20    |
|----------------------------------------------------------------------|------------------------|------------------------|---------------------------|
| <b>Gross Motor Function Classification System (GMFCS) and MACS</b>   |                        |                        |                           |
| Spearman's rho (p)                                                   | 0.78 (<0.001)          | 0.76 (<0.001)          | 0.84 (<0.001)             |
| Pearson's r (95% CI)                                                 | 0.78 (0.67 to 0.85)    | 0.73 (0.57 to 0.83)    | 0.81 (0.58 to 0.92)       |
| <b>GMFCS and Communication Function Classification System (CFCS)</b> |                        |                        |                           |
| Spearman's rho (p)                                                   | 0.49 (0.005)           | 0.45 (0.01)            | 0.61 (0.004)              |
| Pearson's r (95%CI)                                                  | 0.49 (0.29 to 0.64)    | 0.37 (0.11 to 0.58)    | 0.43 (-0.01 to 0.74)<br>* |
| <b>GMFCS and Level of Sitting Scale (LSS)</b>                        |                        |                        |                           |
| Spearman's rho (p)                                                   | -0.71 (0.003)          | -0.72 (0.03)           | -0.71 (<0.001)            |
| Pearson's r (95%CI)                                                  | -0.71 (-0.81 to -0.58) | -0.72 (-0.83 to -0.56) | -0.55 (-0.80 to -0.14)    |
| <b>Manual Abilities Classification System (MACS) and CFCS</b>        |                        |                        |                           |
| Spearman's rho (p)                                                   | 0.50 (<0.001)          | 0.48 (<0.001)          | 0.62 (0.004)              |
| Pearson's r (95%CI)                                                  | 0.50 (0.31 to 0.66)    | 0.46 (0.22 to 0.65)    | 0.63 (0.25 to 0.84)       |
| <b>MACS and LSS</b>                                                  |                        |                        |                           |
| Spearman's rho (p)                                                   | -0.62 (<0.001)         | -0.63 (<0.001)         | -0.64 (0.002)             |
| Pearson's r (95%CI)                                                  | -0.62 (-0.74 to -0.45) | -0.55 (-0.71 to -0.33) | -0.63 (0.84 to -0.26)     |
| <b>CFCS and LSS</b>                                                  |                        |                        |                           |
| Spearman's rho (p)                                                   | -0.37 (0.10)#          | -0.27 (0.50)#          | -0.61 (0.002)             |
| Pearson's r (95%CI)                                                  | -0.37 (-0.55 to -0.16) | -0.21 (-0.46 to -0.05) | -0.70 (-0.87 to -0.36)    |

CP = cerebral palsy; \* = crosses 0; # not significant
