# Supplementary material for: Beginning power mobility: An exploration of factors associated with child use of early power mobility devices and parent device preference
Source: PubMed Central journal article supplement — J Rehabil Assist Technol Eng. 2020 Jun 17;7:2055668320926046. doi: 10.1177/2055668320926046 (PMC7301654; doi:10.1177/2055668320926046), 2020-06-17
Supplement: sj-pdf-3-jrt-10.1177_2055668320926046.pdf [file sj-pdf-3-jrt-10.1177_2055668320926046.pdf]

### Appendix 3: ALP sub-group analyses population descriptors

#### 1. ALP Stable group – children whose ALP phase was stable (did not change more than 1 ALP phase across devices n = 63)

Diagnoses: CP = 47 (74.60%); Neuromuscular = 2 (3.17%); Neurodegenerative = 4 (6.35%); Other = 10 (15.87%)

| Age (months)   | Minimum      | 1 <sup>st</sup> Quartile | Median       | Mean          | 3 <sup>rd</sup> Quartile | Maximum       |               |
|----------------|--------------|--------------------------|--------------|---------------|--------------------------|---------------|---------------|
|                | 9.00         | 17.50                    | 31.00        | 31.25         | 40.00                    | 68.00         |               |
| Classification | I            | II                       | III          | IV            | V                        |               |               |
| GMFCS*         | 2            | 2                        | 17           | 20            | 22                       |               |               |
| MACS*          | 2            | 15                       | 15           | 15            | 16                       |               |               |
| CFCS           | 0            | 2                        | 7            | 34            | 20                       |               |               |
| LSS            | Level 8<br>3 | Level 7<br>3             | Level 6<br>0 | Level 5<br>13 | Level 4<br>12            | Level 3<br>21 | Level 2<br>11 |

Access Method: Joystick users = 41    Switch users = 22

#### 2. ALP Change group – children whose ALP phase changed by more than 1 ALP phase across devices n = 11

Diagnoses: CP = 7 (63.64%); Neuromuscular = 2 (18.18%); Neurodegenerative = 0; Other = 2 (18.18%)

| Age (months)   | Min          | 1 <sup>st</sup> Quartile | Median       | Mean         | 3 <sup>rd</sup> Quartile | Maximum      |              |
|----------------|--------------|--------------------------|--------------|--------------|--------------------------|--------------|--------------|
|                | 17.00        | 32.00                    | 42.00        | 41.22        | 47.00                    | 57.00        |              |
| Classification | I            | II                       | III          | IV           | V                        |              |              |
| GMFCS*         | 0            | 1                        | 5            | 4            | 1                        |              |              |
| MACS*          | 2            | 3                        | 5            | 0            | 1                        |              |              |
| CFCS           | 3            | 4                        | 3            | 0            | 1                        |              |              |
| LSS            | Level 8<br>1 | Level 7<br>1             | Level 6<br>1 | Level 5<br>5 | Level 4<br>2             | Level 3<br>0 | Level 2<br>1 |

Access Method: Joystick users = 10    Switch users = 1

#### ALP 4-6 group – children who achieved ALP phase 4 or higher in at least one device n = 14 (includes children from both the stable and the change groups above)

Diagnosis: CP = 10 (71.43%); Neuromuscular = 2 (14.29%); Neurodegenerative = 0; Other = 2 (14.29%)

| Age (months)   | Min          | 1 <sup>st</sup> Quartile | Median       | Mean         | 3 <sup>rd</sup> Quartile | Maximum      |              |
|----------------|--------------|--------------------------|--------------|--------------|--------------------------|--------------|--------------|
|                | 23.00        | 34.00                    | 42.00        | 41.22        | 47.00                    | 57.00        |              |
| Classification | I            | II                       | III          | IV           | V                        |              |              |
| GMFCS*         | 0            | 1                        | 8            | 5            | 0                        |              |              |
| MACS*          | 2            | 7                        | 4            | 1            | 0                        |              |              |
| CFCS           | 3            | 2                        | 4            | 5            | 0                        |              |              |
| LSS            | Level 8<br>2 | Level 7<br>1             | Level 6<br>0 | Level 5<br>5 | Level 4<br>4             | Level 3<br>2 | Level 2<br>0 |

Joystick users = 14    Switch users = 0

ALP = Assessment of Learning Powered mobility use; CFCS = Communication Function Classification System; CP = cerebral palsy; GMFCS = Gross Motor Function Classification System; MACS = Manual Abilities Classification System (includes MiniMACS\* for children under 4 years); LSS = Level of Sitting Scale;

\* indicates equivalent level of function for children with a diagnosis other than cerebral palsy
