# Supplementary material for: Beginning power mobility: An exploration of factors associated with child use of early power mobility devices and parent device preference
Source: PubMed Central journal article supplement — J Rehabil Assist Technol Eng. 2020 Jun 17;7:2055668320926046. doi: 10.1177/2055668320926046 (PMC7301654; doi:10.1177/2055668320926046), 2020-06-17
Supplement: sj-pdf-4-jrt-10.1177_2055668320926046.pdf [file sj-pdf-4-jrt-10.1177_2055668320926046.pdf]

Appendix 4: Pairwise correlations between devices for ALP\* phase achieved

|                            | <b>All complete pairs</b> | <b>All four devices tried</b> |
|----------------------------|---------------------------|-------------------------------|
| <b>Wizzybug and Bugzi</b>  |                           |                               |
| n =                        | 60 pairs                  | 51 pairs                      |
| Spearman's rho (p)         | 0.77 (<0.001)             | 0.77 (<0.001)                 |
| <b>Wizzy and Tiger cub</b> |                           |                               |
| n =                        | 63 pairs                  | 51 pairs                      |
| Spearman's rho (p)         | 0.85 (<0.001)             | 0.86 (<0.001)                 |
| <b>Wizzybug and Car</b>    |                           |                               |
| n =                        | 57 pairs                  | 51 pairs                      |
| Spearman's rho (p)         | 0.78 (<0.001)             | 0.76 (<0.001)                 |
| <b>Bugzi and Tiger cub</b> |                           |                               |
| n =                        | 66 pairs                  | 51 pairs                      |
| Spearman's rho (p)         | 0.80 (<0.001)             | 0.84 (<0.001)                 |
| <b>Bugzi and Car</b>       |                           |                               |
| n =                        | 57 pairs                  | 51 pairs                      |
| Spearman's rho (p)         | 0.64 (<0.001)             | 0.64 (<0.001)                 |
| <b>Tiger cub and Car</b>   |                           |                               |
| n =                        | 56 pairs                  | 51 pairs                      |
| Spearman's rho (p)         | 0.82 (<0.001)             | 0.80 (<0.001)                 |

\*ALP = Assessment of Learning Powered mobility use
